# The role of the fornix in human navigational learning

Carl J. Hodgetts<sup>1</sup>, Martina Stefani<sup>1</sup>, Angharad N. Williams<sup>1</sup>, Branden S. Kolarik<sup>2</sup>,  
Andrew P. Yonelinas<sup>3,4</sup>, Arne D. Ekstrom<sup>5</sup>, Andrew D. Lawrence<sup>1</sup>, Jiaxiang Zhang<sup>1</sup> &  
Kim S. Graham<sup>1</sup>

(1) Cardiff University Brain Research Imaging Centre, School of Psychology, Cardiff University,  
Cardiff CF24 4HQ, Wales, UK

(2) Center for the Neurobiology of Learning & Memory, University of California, Irvine, USA

(3) Department of Psychology, University of California, Davis, California, 95618

(4) Center for Neuroscience, University of California, Davis, California, 95618

(5) Department of Psychology, The University of Arizona, Arizona 85721

## Manuscript information

**Abbreviated title:** The fornix and human navigational learning

**Number of pages:** 34

**Number of figures:** 3

**Number of tables:** 0

**Number of words:** Abstract (193); Introduction (648); Discussion (1763)

**Competing financial interests:** The authors declare no competing financial and non-financial interests.

**Corresponding author:** Dr Carl J Hodgetts: Cardiff University Brain Research Imaging Centre, School of Psychology, Cardiff University, Maindy Road, Cardiff CF24 4HQ, Wales, UK; Tel: 029 2087 0715; Email: [hodgettsci@cardiff.ac.uk](mailto:hodgettsci@cardiff.ac.uk)

1 **Abstract**

2 Studies in rodents have demonstrated that transecting the white matter pathway  
3 linking the hippocampus and anterior thalamic nuclei - the fornix - impairs flexible  
4 navigational learning in the Morris Water Maze (MWM), as well as similar spatial  
5 learning tasks. While diffusion MRI studies in humans have linked fornix  
6 microstructure to scene discrimination and memory, its role in human navigation is  
7 currently unknown. We used high-angular resolution diffusion MRI to ask whether  
8 inter-individual differences in fornix microstructure would be associated with spatial  
9 learning in a virtual MWM task. To increase sensitivity to individual learning across  
10 trials, we adopted a novel curve fitting approach to estimate a single index of  
11 learning rate. We found a significant correlation between learning rate and the  
12 microstructure (mean diffusivity) of the fornix, but not that of a control tract linking  
13 occipital and anterior temporal cortices (the inferior longitudinal fasciculus, ILF).  
14 Further, this correlation remained significant when controlling for hippocampal  
15 volume. These findings extend previous animal studies by demonstrating the  
16 functional relevance of the fornix for human navigational learning, and highlight the  
17 importance of a distributed neuroanatomical network, underpinned by key white  
18 matter pathways, such as the fornix, in complex spatial behaviour.

19

20 **Key words:** hippocampus; navigation; spatial learning; cognitive map; diffusion MRI;  
21 connectivity

22

23

24

## 25 **Introduction**

26 The ability to navigate, and learn the location of rewards and goals in the  
27 environment, is a fundamental and highly adaptive cognitive function across species  
28 (Landau and Lakusta, 2009; Wolbers and Hegarty, 2010; Murray et al., 2016).

29 Lesion studies in animals suggest that this ability depends, in part, on several key  
30 brain regions, including the hippocampus, mammillary bodies, and the anterior  
31 thalamic nuclei (Sutherland and Rodriguez, 1989; Warburton and Aggleton, 1998;  
32 Jankowski et al., 2013), which in turn connect with a broader network including  
33 entorhinal, parahippocampal, retrosplenial, and posterior parietal cortex, all thought  
34 to be important for navigation (Ekstrom et al., 2017). In particular, the hippocampus,  
35 mammillary bodies, and anterior thalamic nuclei are connected anatomically by an  
36 arch-shaped white matter pathway called the fornix (Saunders and Aggleton, 2007).  
37 Given the role of these interconnected structures in spatial learning and navigation  
38 (Jankowski et al., 2013), the ability for these distributed regions to communicate via  
39 the fornix may also be critical for successful spatial learning and navigation.

40

41 Indeed, transecting the fornix in rodents and monkeys impairs learning for objects-in-  
42 place, but not the objects themselves (Gaffan, 1992, 1994; Simpson et al., 1998).

43 These findings also extend to performance on spatial navigation tasks, most notably  
44 the Morris Water Maze (MWM). The MWM is one of the most widely used laboratory  
45 tasks in studies of navigational behaviour across non-human species and has been  
46 recognized as an excellent candidate for a universal test of spatial navigation ability  
47 (Morris, 1984; Possin et al., 2016). In this task, animals are placed in a circular pool  
48 and required to swim to a hidden platform beneath the surface using allocentric cues

49 outside the pool. Several studies have shown that fornix-transected rodents are  
50 impaired on the MWM, particularly when required to navigate flexibly from multiple  
51 positions within the maze (Eichenbaum et al., 1990; Packard and McGaugh, 1992;  
52 Warburton et al., 1998; Warburton and Aggleton, 1998; De Bruin et al., 2001; Cain et  
53 al., 2006). Fornix transection also impairs allocentric place learning in other maze  
54 tasks (O'Keefe et al., 1975; Olton et al., 1978; Packard et al., 1989; Dumont et al.,  
55 2015).

56

57 Critically, while these animal studies highlight a key role for the fornix in spatial  
58 learning - across both visuo-spatial discrimination and navigation tasks - the role of  
59 this white matter pathway in human wayfinding is currently unknown. Studies using  
60 diffusion magnetic resonance imaging (dMRI), which allows white matter  
61 microstructure to be quantified *in vivo*, have reported associations in healthy human  
62 subjects between fornix microstructure and inter-individual differences in scene and  
63 spatial context processing across both memory (Rudebeck et al., 2009; Hodgetts et  
64 al., 2017) and perceptual tasks (Postans et al., 2014; Hodgetts et al., 2015). Given  
65 differences in the visuospatial representations underpinning navigation across  
66 rodents and humans (Ekstrom, 2015), it begs the question whether this same  
67 extended functional system, structurally linked by the fornix, is similarly important for  
68 navigational learning in humans.

69

70 To test this, we acquired dMRI data in healthy human subjects who performed a  
71 human analogue of the MWM (Figure 1). In this task, individuals were required to  
72 learn, over trials, the location of a hidden sensor within a virtual art gallery. Similar to

73 the rodent paradigm, subjects were required to navigate from multiple starting  
74 positions, thus placing greater demand on flexible allocentric processing (Figure 1).  
75 To create a single index of navigational learning rate, we used a curve fitting  
76 approach to model the time taken to reach the sensor across trials (for similar  
77 approaches, see Stepanov and Abramson, 2008; Pereira and Burwell, 2015; Kahn et  
78 al., 2017). We predicted, based on previous work (Packard and McGaugh, 1992;  
79 Warburton and Aggleton, 1998; Cain et al., 2006; Hodgetts et al., 2015), that  
80 microstructure of the fornix, but not a control tract connecting occipital and anterior  
81 temporal cortices (the “inferior longitudinal fasciculus”, ILF) (Latini, 2015), would be  
82 significantly related to spatial learning rate in a virtual MWM task.

83

## 84 **Methods**

### 85 ***Participants***

86 Thirty-three healthy volunteers (15 males, 18 females; mean age = 24 years; SD =  
87 3.5 years) were scanned at the Cardiff University Brain Research Imaging Centre  
88 (CUBRIC). These same participants completed a virtual Morris Water Maze task in a  
89 separate behavioural session. All subjects were fluent English speakers with normal  
90 or corrected-to-normal vision. Participation in both sessions was undertaken with the  
91 understanding and written consent of each subject. The research was completed in  
92 accordance with, and approved by, the Cardiff University School of Psychology  
93 Research Ethics Committee.

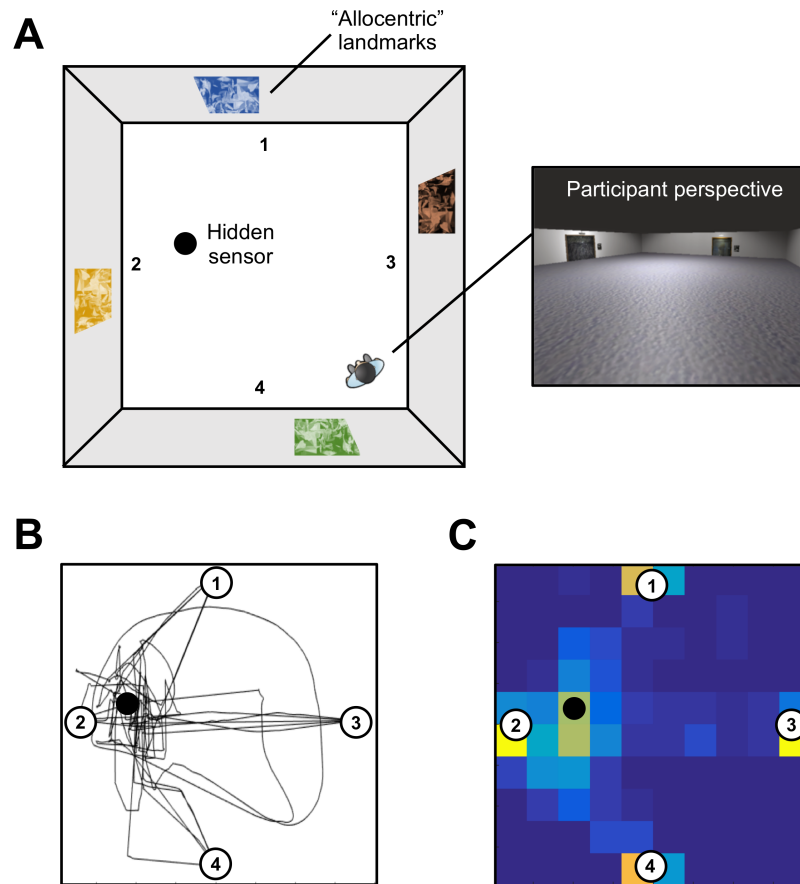

94

95 **Figure 1. The virtual reality Morris Water Maze.** (A) Birds-eye schematic of the  
96 virtual art gallery that the participants explore during the task. The artwork on the  
97 outer walls of the gallery are the “landmarks” in the virtual arena. An example first  
98 person perspective from within the maze is shown. (B) Movement trajectories and  
99 (C) location heatmap across all 20 trials for an example participant.

100

### 101 **Virtual Morris Water Maze Task**

102 We used the virtual MWM task developed by Kolarik et al. (2016). This task was  
103 created using Unity 3D (Unity Technologies, San Francisco) and required  
104 participants to explore, from a first-person perspective, a virtual art gallery using the  
105 arrow keys on the computer keyboard (Figure 1A). The room was 8 x 8 virtual m<sup>2</sup> in

106 size, and contained four distinct paintings, one on each wall of the environment. On  
107 a given trial, the participants' task was to locate a hidden sensor on the floor as  
108 quickly as possible. This sensor occupied 0.25% of the total floor space (i.e., an 0.8  
109 x 0.8 m<sup>2</sup> square). When the participant walked over the hidden platform it became  
110 visible and the caption 'You found the hidden sensor' was displayed in the centre of  
111 the screen. At this point, the exploration time was recorded automatically and a 10  
112 second countdown appeared in the centre of the display during which the  
113 participants could freely navigate the room. After this countdown, an inter-trial  
114 window appeared and the participants could click on a button to start the next  
115 learning trial. The maximum duration of each learning trial was 60 seconds. If the  
116 participant did not find the target location within this period, the sensor became  
117 visible. The task involved 20 learning trials, which comprised five blocks of four trials.  
118 Within each block, participants started from each of the four starting positions  
119 (arbitrary North, South, East, West). The movement trajectories and location  
120 heatmap for an example participant is shown in Figure 1B-C.

121

### 122 ***MRI acquisition***

123 Whole brain dMRI data were acquired at the Cardiff University Brain Research  
124 Imaging Centre (CUBRIC) using a 3T GE HDx Signa scanner with an eight-channel  
125 head coil. Single-shell high-angular resolution dMRI (HARDI) (Tuch et al., 2002) data  
126 were collected with a single-shot spin-echo echo-planar imaging pulse sequence  
127 with the following parameters: 30 directions; TE= 87 ms; 60 continuous slices  
128 acquired along an oblique-axial plane with 2.4 mm thickness and no gap. The scans  
129 were cardiac-gated using a peripheral pulse oximeter placed on the participants'  
130 fingertips. A T1-weighted 3D FSPGR sequence was also acquired with the following

131 parameters: TR= 7.8 ms; TE= 3 ms, TI= 450 ms, flip angle= 20°; FOV= 256 mm\*192  
132 mm\*172 mm; 1 mm isotropic resolution.

133

### 134 ***Diffusion MRI preprocessing***

135 Diffusion MRI data were corrected for subject head motion and eddy currents using  
136 ExploreDTI (Version 4.8.3; Leemans and Jones, 2009). The bi-tensor 'Free Water  
137 Elimination' (FWE) procedure was applied *post hoc* to correct for voxel-wise partial  
138 volume artifacts arising from free water contamination (Pasternak et al., 2009). Free  
139 water contamination (from cerebrospinal fluid) is a particular issue for white matter  
140 pathways located near the ventricles (such as the fornix), and has been shown to  
141 significantly affect tract delineation (Concha et al., 2005). Following FWE, corrected  
142 diffusion-tensor indices FA and MD were computed. FA reflects the extent to which  
143 diffusion within biological tissue is anisotropic, or constrained along a single axis,  
144 and can range from 0 (fully isotropic) to 1 (fully anisotropic). MD ( $10^{-3}\text{mm}^2\text{s}^{-1}$ ) reflects  
145 a combined average of axial diffusion (diffusion along the principal axis) and radial  
146 diffusion (diffusion along the orthogonal direction).

147

### 148 ***Tractography***

149 Deterministic whole brain white matter tractography was performed using the  
150 ExploreDTI graphical toolbox. Tractography was based on constrained spherical  
151 deconvolution (CSD) (Jeurissen et al., 2011), which can extract multiple peaks in the  
152 fiber orientation density function (fODF) at each voxel. This approach permits the  
153 representation of crossing/kissing fibers in individual voxels. Each streamline was  
154 reconstructed using an fODF amplitude threshold of 0.1 and a step size of 1mm, and  
155 followed the peak in the fODF that subtended the smallest step-wise change in



156 orientation. An angle threshold of 30° was used and any streamlines exceeding this  
157 threshold were terminated.

158

159 Three-dimensional reconstructions of each tract were obtained from individual  
160 subjects by using a waypoint region of interest (ROI) approach, based on an  
161 anatomical prescription. Here, “AND” and “NOT” gates were applied, and combined,  
162 to extract tracts from each subject’s whole brain tractography data. These ROIs were  
163 drawn manually on the direction-encoded FA maps in native space by one  
164 experimenter (MS) and quality assessed by other experimenters (CJH, ANW).

165

166 *Fornix*

167 A multiple region-of-interest (ROI) approach was adopted to reconstruct the fornix  
168 (Metzler-Baddeley et al., 2011). This approach involved placing a seed point ROI on  
169 the coronal plane at the point where the anterior pillars enter the fornix body. Using a  
170 mid-sagittal plane as a guide, a single AND ROI was positioned on the axial plane,  
171 encompassing both crus fornici at the lower part of the splenium of the corpus  
172 callosum. Three NOT ROIs were then placed: (1) anterior to the fornix pillars; (2)  
173 posterior to the crus fornici; and (3) on the axial plane, intersecting the corpus  
174 callosum. Once these ROIs were placed, and the tracts reconstructed, anatomically  
175 implausible fibers were removed using additional NOT ROIs (see Hodgetts et al.,  
176 2017).

177

178 *Inferior longitudinal fasciculus (ILF)*

179 Fiber-tracking of the ILF (control tract) was performed using a two-ROI approach in  
180 each hemisphere (Wakana et al., 2007). First, the posterior edge of the cingulum

181 bundle was identified on the sagittal plane. Reverting to a coronal plane at this  
182 position, a SEED ROI was placed that encompassed the whole hemisphere. To  
183 isolate streamlines extending towards the anterior temporal lobe (ATL), a second  
184 ROI was drawn at the most posterior coronal slice in which the temporal lobe was  
185 not connected to the frontal lobe. Here, an additional AND ROI was drawn around  
186 the entire temporal lobe. Similar to the fornix protocol above, any anatomically  
187 implausible streamlines were removed using additional NOT ROIs. This approach  
188 was carried out in both hemispheres; diffusion properties of the left and right ILF (for  
189 both FA and MD) were averaged across hemispheres to provide a bilateral measure  
190 of ILF FA and MD in each participant.

191

### 192 ***Grey matter volumetry***

193 Bilateral hippocampal volume was derived using FMRIB's Integrated Registration &  
194 Segmentation Tool (FIRST; Patenaude et al., 2012). As temporal lobe substructures  
195 have been shown to correlate with intracranial volume (Moran et al., 2001),  
196 individual-level hippocampal volumes were divided by total intracranial volume  
197 (eTIV) to create proportional scores (Westman et al., 2013).

198

### 199 ***Statistical analysis of maze learning***

200 To increase sensitivity to individual-level performance across learning trials, and to  
201 derive a single index of learning rate, we analysed the relationship between spatial  
202 learning and fornix tissue microstructure using a curve fitting approach (see e.g.,  
203 Pereira and Burwell, 2015; Kahn et al., 2017). Performance on each learning trial  
204 was defined by the time (in seconds) to reach the hidden sensor. As can be seen in  
205 Figure 2A, there was high inter-individual variability in spatial learning, with subjects

206 varying in both learning speed and the shape of their learning pattern. Here,  
207 individual learning data was fit using a power function: Time to sensor =  $a * x^b$ ,  
208 where b specifies the slope of the fitted power model.

209

210 One aspect of this data is that some subjects learned quickly (and plateaued) before  
211 displaying variable, or slow, performance in the later trials (e.g., subjects 9, 13, and  
212 20; Figure 2B). This presents a challenge for a curve fitting approach across all trials  
213 (and potentially produces counterintuitive results), as some of the fastest learners  
214 will show the poorest model fits. For instance, both subjects 9 and 16 display an  
215 initial steep learning curve and an early plateau (Figure 2B), but a power model fit to  
216 *all trials* provides a poor fit of the subject who does not sustain performance until the  
217 end of the task. In order to account for this complexity in learning patterns, we  
218 adopted a data-driven approach to determine a cut-off in individual subjects.

219 Specifically, a second-order polynomial model was fit to all trials in each subject  
220 using the curve fitting toolbox in Matlab (Mathworks, Inc.). The cut-off was defined as  
221 the trough of this curve, which is where the first derivative of the second-degree  
222 polynomial crosses zero (Figure 2C). Trials up to and including this cut-off were then  
223 modelled using a power function (mean trials included = 14.3; range = 7 – 20).

224

225

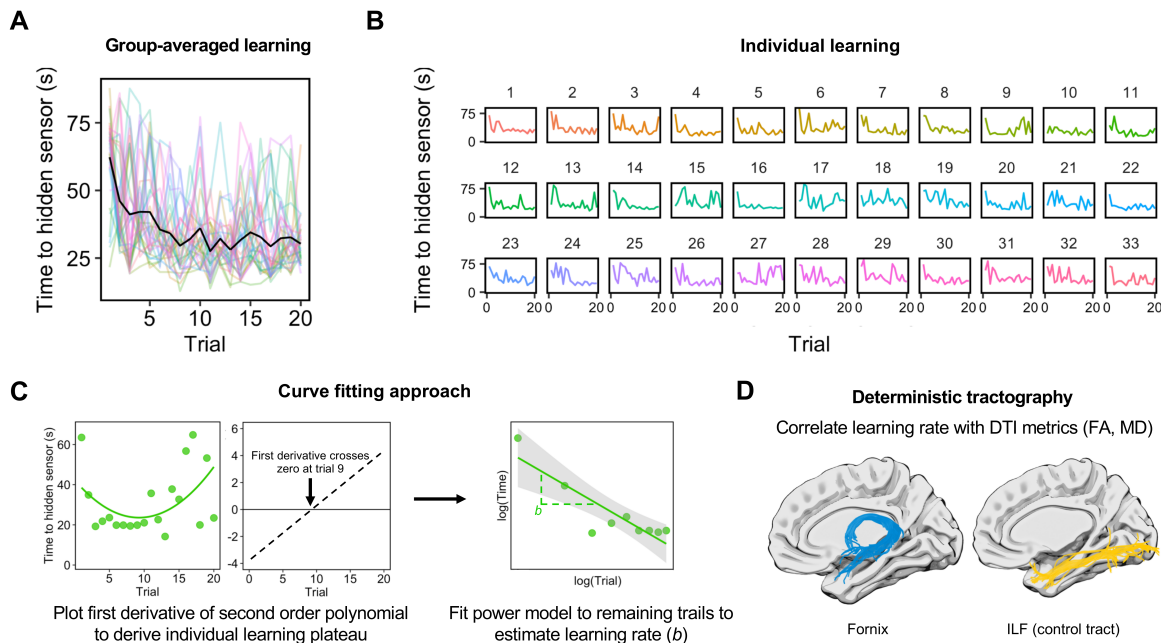

226

227 **Figure 2. Modelling navigational learning in individual participants. MWM task**

228 learning at the (A) group-level and (B) individual-level. Y-axes represent the time to

229 reach the hidden sensor in seconds. The number of trials (total = 20) is shown on the

230 x-axis. (C) Method for determining the number of learning trials to-be-modelled.

231 Some participants appeared to learn rapidly and plateau before displaying variable

232 performance in later trials. For instance, a power model fits the example participant's

233 latency data poorly when all trials are considered. In order to capture initial learning,

234 therefore, we fitted the latency data (across all trials) with a second-order polynomial

235 in each subject. The point at which the first derivative of this polynomial crossed zero

236 was used to define the number of trials to-be-modelled. The trials up to this point

237 were then fit with a power function and the  $b$  parameter derived to index learning

238 rate. Power fits are shown by linearly fitting the log-transformed data. (D) Learning

239 rate measures were correlated with diffusion metrics (FA, MD) from the fornix (blue)

240 and the ILF (yellow). Tract reconstructions are shown against an inflated brain for

241 visualisation purposes.

242 Using this approach, we derived a single measure of learning rate, denoted by the b  
243 parameter (or slope) of the fitted power model ( $b$ ; mean = -0.32, SD = 0.08, range = -  
244 0.49 to -0.19). The  $b$  parameter reflects slope curvilinearity in each subject, where  
245 lower, negative values reflect more convex downward curves and thus faster  
246 learning rates. As such, we predict a positive association between fornix MD and  
247 learning rate, and negative associations between fornix FA and learning rate.

248

249 Directional Pearson correlations were conducted between the learning rate and free  
250 water corrected MD and FA values for the fornix and ILF (Figure 2D). The resulting  
251 coefficients were compared statistically using directional Steiger Z-tests (Steiger,  
252 1980) within the 'cocor' package in R (Diedenhofen and Musch, 2015).

253 Pearson correlations were Bonferroni-corrected by dividing  $\alpha = 0.05$  by the number  
254 of statistical comparisons for each DTI metric (i.e.,  $0.05/2 = 0.025$ ) (Lakens, 2016).

255 Prior to correlational analyses, outliers for each tract and metric were identified and  
256 removed using the Tukey method in R. This excluded an extreme value for fornix  
257 MD, fornix FA, and ILF FA. To exclude poor performers who were not engaging with  
258 the task, we used a resampling approach where individual-level data was shuffled  
259 over 500 permutations and confidence intervals (CIs) derived. Participants with a  
260 model  $R^2$  that fell outside the CI of their individually-defined random distribution were  
261 excluded (Subjects 10, 15, 17, 18 and 21).

262

263 We also conducted Bayesian correlation analyses using JASP ([https://jasp-](https://jasp-stats.org)  
264 [stats.org](https://jasp-stats.org)). From this, we report default Bayes factors and 95% Bayesian credibility  
265 intervals (BCI). The Bayes factor, expressed as  $BF_{10}$  grades the intensity of the  
266 evidence that the data provide for the alternative hypothesis ( $H_1$ ) versus the null

267 (H<sub>0</sub>) on a continuous scale. A BF<sub>10</sub> of 1 indicates that the observed finding is equally  
268 likely under the null and the alternative hypothesis. A BF<sub>10</sub> much greater than 1  
269 allows us to conclude that there is substantial evidence for the alternative over the  
270 null. Conversely BF<sub>10</sub> values substantially less than 1 provide strong evidence in  
271 favour of the null over the alternative hypothesis (Wetzels and Wagenmakers, 2012).

272

273 Complementary Spearman's rho tests were also conducted for our key correlations.  
274 The strength of Spearman's correlations were compared directly using a robust  
275 bootstrapping approach (Wilcox, 2016), as implemented using 'comp2dcorr' in  
276 Matlab (<https://github.com/GRousselet/blog/tree/master/comp2dcorr>).

277

## 278 **Results**

### 279 ***Correlating navigational learning with tract microstructure***

280 There was a significant positive correlation between the derived learning rate and  
281 fornix MD, as shown in Figure 3. This suggests that those subjects with lower fornix  
282 MD had faster learning rates ( $r = 0.44$ ,  $p = 0.01$ , 95% BCI [0.09, 0.68],  $B_{+0} = 5.5$ ;  
283 Figure 3). There was no significant relationship between individual learning rate and  
284 MD in a control tract - the inferior longitudinal fasciculus (ILF;  $r = -0.06$ ;  $p = 0.62$ ,  
285 95% BCI [0.37, 0.01],  $B_{0+} = 5.38$ ). A directional Steiger Z-test (Steiger, 1980)  
286 revealed that the correlation between derived learning rate and fornix MD was  
287 significantly greater than with ILF MD ( $z = 2.26$ ,  $p = 0.01$ ).

288

289 A moderate trend was observed between fornix FA and learning rate but this did not  
290 reach our experiment-wise significance level ( $r = -0.34$ ,  $p = 0.04$ , 95% BCI [-0.62, -  
291 0.04],  $B_{-0} = 1.99$ ; Figure 3). There was no significant correlation between ILF FA and

292 learning rate ( $r = -0.17$ ;  $p = 0.2$ , 95% BCI  $[-0.51, -0.01]$ ,  $B_0 = 1.68$ ). These two  
 293 correlations did not differ significantly ( $z = 0.22$ ,  $p = 0.21$ ).

294

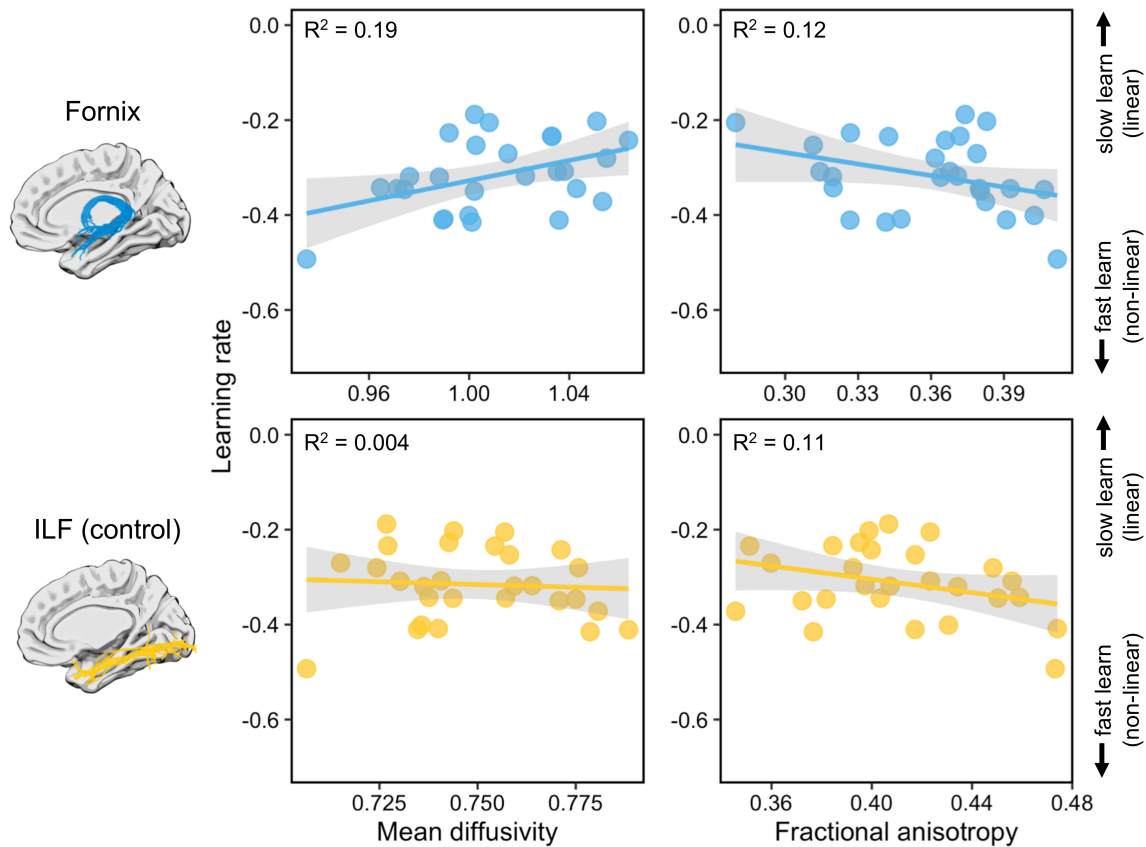

295

296 **Figure 3.** The correlation between tract microstructure and learning rate (*b*  
 297 parameter) for the fornix (top row) and the inferior longitudinal fasciculus (ILF).

298

### 299 **Controlling for hippocampal volume**

300 To examine whether hippocampal volume contributes to the microstructural-  
 301 behavioural correlations reported above, partial correlations (both frequentist and  
 302 Bayesian) were conducted. The significant positive correlation between the learning  
 303 rate parameter and fornix MD remained when controlling for bilateral hippocampal  
 304 volume ( $r = 0.4$ ,  $p = 0.02$ ,  $BF_{+0} = 3.59$ ), as seen in prior studies (Hodgetts et al.,

305 2017). For fornix FA, a slightly stronger negative trend was observed ( $r = -0.35$ ,  $p =$   
306  $0.04$ ,  $BF_0 = 0.09$ ) when hippocampal volume was controlled for, though this did not  
307 reach our experiment-wise significance level (i.e.,  $p = 0.025$ ). When examining  
308 hippocampal volume, independent of fornix microstructural measures, there was no  
309 significant association found between hippocampal volume and learning rate ( $r =$   
310  $0.03$ ,  $p = 0.94$ , 95% BCI  $[-0.25, -0.002]$ ,  $B_0 = 10.2$ ).

311

### 312 ***Non-parametric correlations between tract microstructure and learning***

313 Finally, we also conducted complementary directional Spearman's rho tests for our  
314 key correlations, with such tests robust to univariate outliers (Croux and Dehon,  
315 2010). As above, Spearman's correlations were Bonferroni-corrected by dividing  $\alpha =$   
316  $0.05$  by the number of statistical comparisons for each DTI metric (i.e.,  $0.05/2 =$   
317  $0.025$ ). A significant positive association was observed between learning rate and  
318 fornix MD ( $\rho = 0.4$ ,  $p = 0.02$ ). No significant association was found with ILF MD ( $\rho = -$   
319  $0.18$ ,  $p = 0.82$ ). A strong trend was found between the b parameter and fornix FA ( $\rho$   
320  $= -0.32$ ,  $p = 0.05$ ) but not ILF FA ( $\rho = -0.21$ ,  $p = 0.14$ ).

321

322 A direct comparison between these correlations revealed a significant difference  
323 between fornix MD and ILD MD and their association with navigation learning rate,  
324 as indicated by the bootstrap distribution not overlapping with zero (95% CI =  $0.2 -$   
325  $0.88$ ,  $p = 0$ ). There was no significant difference between the FA correlations (95%  
326 CI =  $-0.7191 - 0.2962$ ,  $p = 0.4$ ).

327

328

329



## 330 **General discussion**

331 Using a virtual-reality analogue of a classic navigational paradigm, the Morris Water  
332 Maze (Morris, 1984), we asked whether inter-individual variation in the  
333 microstructure of the fornix (linking hippocampus with medial diencephalon and  
334 prefrontal cortex) is related to individual differences in navigational learning. To  
335 increase sensitivity to individual learning across trials we adopted a curve fitting  
336 approach (Kahn et al., 2017), which generated a single index of learning rate ('b') in  
337 each individual. We found that fornix microstructure (particularly MD) was  
338 significantly associated with navigational learning rate in a virtual MWM task, as  
339 defined by the slope of the fitted power model, and this association remained when  
340 controlling for bilateral hippocampal volume. Furthermore, this effect was  
341 significantly stronger than that seen for the ILF, a control tract linking occipital and  
342 anterior temporal cortices, which has previously been implicated in semantic learning  
343 (Qi et al., 2015; Ripollés et al., 2017).

344

345 These results build upon previous animal studies that highlight a potential key role  
346 for the fornix in mediating place learning and navigational behaviour. Critically, we  
347 provide novel evidence, using a MWM task analogous to that used in animals  
348 (Kolarik et al., 2016; Possin et al., 2016), that the fornix supports navigational  
349 learning in humans. In rodents, fornix transection has been shown to impair MWM  
350 learning, as characterised by more gradual learning slopes and slower latencies in  
351 finding the hidden platform (Eichenbaum et al., 1990; Packard and McGaugh, 1992;  
352 Warburton and Aggleton, 1998; Cain et al., 2006). By applying a curve fitting  
353 approach, we were able to characterise the steepness of learning slopes at the

354 individual participant level, and relate this directly with fornix microstructure.  
355 Strikingly consistent with the animal studies described above, reduced structural  
356 connectivity in the fornix (indexed by higher MD) was related to more gradual  
357 learning rates. Further, by identifying individual learning plateaus in a data-driven  
358 way, this approach also accounts for potential fatigue, mind-wandering or other  
359 factors that may affect performance later in the learning session.

360

361 Similar to lesioning hippocampus and anterior thalamic nuclei, learning deficits  
362 following fornix transection in rodents are also more severe when the animal is  
363 required to navigate from multiple start positions (Eichenbaum et al., 1990). Such  
364 findings suggest, therefore, that this broader neuroanatomical system, structurally  
365 underpinned by the fornix (Aggleton et al., 2010), supports spatial learning in a  
366 flexible manner (i.e., from novel start positions, or from different perspectives), rather  
367 than response-based learning, that appears to recruit regions outside this extended  
368 hippocampal system, specifically the caudate nucleus (Packard and McGaugh,  
369 1992; Devan et al., 1996; Chersi and Burgess, 2015). Consistent with this, we  
370 observed an association between navigational learning and fornix properties in a  
371 task which required participants to navigate to the goal from multiple starting  
372 positions.

373

374 Overall, this study provides support for the idea that an individual's spatial navigation  
375 ability (Wolbers and Hegarty, 2010) is underpinned, at least in part, by the integrated  
376 functioning of a distributed neuroanatomical network, comprising not only individual  
377 regions (such as the hippocampus and anterior thalamic nuclei), but also the white

378 matter connections linking these brain areas (Jankowski et al., 2013; Murray et al.,  
379 2016). While MWM performance is considered to depend, at least partly, on the  
380 ability to form and utilise detailed allocentric mental representations, or “cognitive  
381 maps” (Tolman, 1948; O’Keefe and Nadel, 1976), human and animal studies  
382 suggest that the role of the fornix in spatial processing may be linked to mechanisms  
383 beyond spatial mapping *per se*.

384

385 For instance, while fornix transection impairs, or at least slows, navigational learning  
386 in the MWM (Warburton and Aggleton, 1998), as discussed above, these  
387 impairments are not as severe as that seen following lesions to the anterior thalamic  
388 nuclei or the hippocampus proper (Eichenbaum et al., 1990; Warburton and  
389 Aggleton, 1998; Cain et al., 2006). This is not to suggest that fornix connectivity is  
390 not important for place representations (Miller and Best, 1980; Shapiro et al., 1989),  
391 but rather that the fornix may support processes which help build and support  
392 detailed cognitive maps (e.g., scene-based processing, path integration) in  
393 conjunction with other brain areas involved in a broader navigation network  
394 (Whishaw and Maaswinkel, 1998; Gaffan et al., 2001). For instance, evidence from  
395 non-human primates suggests a potential key role in forming conjunctive scene  
396 representations (Gaffan, 1991; Hodgetts et al., 2015; Murray et al., 2017). The ability  
397 to learn and remember object-in-scene associations, as well as naturalistic scenes,  
398 is impaired significantly following fornixectomy (Gaffan, 1992; Gaffan et al., 2001;  
399 Buckley et al., 2008).

400

401 Convergent with scene learning deficits reported in monkeys, diffusion MRI studies  
402 in humans have reported associations between fornix microstructure and scene  
403 recollection (Rudebeck et al., 2009), complex scene discrimination (Postans et al.,  
404 2014; Hodgetts et al., 2015) and the ability to retrieve spatiotemporal detail in real-  
405 world memories (Hodgetts et al., 2017). Rather than suggesting a selective role in  
406 allocentric spatial navigation *per se*, these studies support the view that the  
407 connections established by the fornix may be critical for integrating scenes into  
408 coherent spatial representations, which then may contribute to the generation of  
409 detailed map-like representations useful for navigation (Ryan et al., 2010; Fidalgo  
410 and Martin, 2016). An alternative account (Relational Memory Theory), by contrast,  
411 posits that while the extended hippocampal system is essential to spatial navigation  
412 via a cognitive map, its role derives from the relational organization and flexibility of  
413 cognitive maps and not from a selective role in the spatial domain (Eichenbaum,  
414 2017; see also Ekstrom and Ranganath, 2017). The initial formation of such flexible  
415 spatial relations has been argued to critically rely on cholinergic system modulation  
416 of the hippocampus (Ikonen et al., 2002), which is dependent on the fornix (Alonso et  
417 al., 1996), consistent with our findings.

418

419 Note, it is possible that some individual differences in navigational performance may  
420 actually reflect differences in types of spatial strategies employed. For instance,  
421 while some individuals may use a strategy akin to cognitive mapping, i.e., based on  
422 allocentric vectors from the “landmarks” to the hidden sensor, some individuals may  
423 use a strategy based on matching and integrating disparate viewpoints from the  
424 sensor location; a strategy more akin to building a model of the broader scene and

425 layout (Wolbers and Wiener, 2014). While participants were not asked about their  
426 use of spatial strategies in the current study, this would be an interesting avenue for  
427 disentangling scene-based and cognitive mapping approaches in future studies.

428

429 While our findings support the notion that an extended hippocampal-based system,  
430 mediated by the fornix, may be important for navigational learning in humans, it was  
431 notable that the fornix association was present when controlling for HC volume.  
432 Further, there was no independent association between place learning and HC  
433 volume in this task. Though some studies have found associations between  
434 hippocampal grey matter volume and navigational ability in humans (Maguire et al.,  
435 1997; Bohbot et al., 1998; Schinazi et al., 2013; Chrastil et al., 2017), others have  
436 shown that fornix microstructure (but not hippocampal volume) predicts individual  
437 differences in remembering spatiotemporal aspects of autobiographical memories  
438 (e.g., Hodgetts et al., 2017). In addition, studies of individuals with profound  
439 orientation deficits (termed development topographical disorientation, or DTD)  
440 similarly show impairments in connectivity patterns to the hippocampus (in this case,  
441 between hippocampus and prefrontal cortex). Interestingly, like in our study,  
442 hippocampal grey matter does not appear to explain these differences (Iaria et al.,  
443 2009; Iaria and Barton, 2010). This highlights that variation in broader  
444 neuroanatomical systems, rather than regional volumetric variation, may be  
445 particularly sensitive to individual differences in navigational learning.

446

447 Similar to our previous work, we observed stronger effects for fornix MD versus FA  
448 (Postans et al., 2014; Hodgetts et al., 2015). The biological interpretation of this

449 difference is not straightforward, as variation in either measure could arise from  
450 multiple aspect(s) of the underlying white matter, including axon density, axon  
451 diameter, myelination, and the manner in which fibres are arranged in a voxel  
452 (Beaulieu, 2002). A recent study reported strong correspondence between DTI  
453 microstructural indices and underlying myelin microstructure, where high FA was  
454 linked to high myelin density and a sharply tuned histological orientation profile,  
455 whereas high MD was related to diffuse histological orientation and low myelin  
456 density (Seehaus et al., 2015). Diffusion MRI studies applying more advanced  
457 biophysical models of white matter microstructure may be able to provide additional  
458 insight into the specific biological attributes underlying these brain-behaviour  
459 associations (Assaf et al., 2017; Huber et al., 2018).

460

461 The causes of inter-individual variation in white matter microstructure are not fully  
462 understood, but likely involve a complex interplay between genetic and  
463 environmental factors over the lifespan. Evidence from both adults and neonates, for  
464 instance, suggests that the microstructure of the fornix is highly heritable (Lee et al.,  
465 2015; Budisavljevic et al., 2016). The fornix is also one the earliest white matter  
466 tracts to mature, reaching its peak FA and minimum MD before age 20 (Lebel et al.,  
467 2012), and potentially nearing maturation during infancy and childhood (Dubois et  
468 al., 2008). At the same time, evidence suggests that fornix microstructure displays  
469 learning-related plasticity, even over short time periods. For instance, short-term  
470 spatial learning, in both rodents and humans, has been shown to induce alterations  
471 in diffusion indices of fornix microstructure (Hofstetter et al., 2013). Similarly,  
472 navigational ability is influenced by both genetic factors and experience (Lee and  
473 Spelke, 2010; Wolbers and Hegarty, 2010). Thus, fornix microstructure is likely to

474 both shape, and be shaped by spatial navigation, in a bidirectional fashion (Bechler  
475 et al., 2018).

476

477 To conclude, by modelling learning performance on a virtual-reality water maze, we  
478 showed that the microstructure of the main white matter pathway linking the  
479 hippocampus and medial diencephalon – the fornix – predicted individual differences  
480 in human navigational learning. These results suggest that a full understanding of  
481 the biological underpinnings of individual differences in human navigational ability  
482 requires not only the analysis of individual processing regions, but of a distributed  
483 “navigation system”, underpinned by white matter. Critically, given the vulnerability of  
484 this brain system to the deleterious effects of aging (Lester et al., 2017), but also  
485 pathology in Alzheimer’s disease (Braak and Braak, 1991; Oishi et al., 2012), it is a  
486 key priority to develop behavioural markers of navigational ability that are sensitive to  
487 individual variation in this network, as seen here. One study in rodents, for instance,  
488 found that poorer learning on the MWM in early life predicted cognitive impairment in  
489 later life, but also that extensive training in poorer learners buffered against age-  
490 related learning impairments (Hullinger and Burger, 2015). Studies such as this  
491 highlight the potential of navigational learning, particularly as assessed using  
492 translation paradigms (Possin et al., 2016), for characterising, and potentially  
493 ameliorating, the effects of cognitive decline.

494

495

496

497

498 **References**

- 499 Aggleton JP, O'Mara SM, Vann SD, Wright NF, Tsanov M, Erichsen JT (2010)  
500 Hippocampal-anterior thalamic pathways for memory: Uncovering a network of  
501 direct and indirect actions. *Eur J Neurosci* 31:2292–2307.
- 502 Alonso JR, Hoi SU, Amaral DG (1996) Cholinergic innervation of the primate  
503 hippocampal formation: II. Effects of fimbria/fornix transection. *J Comp Neurol*  
504 375:527–551.
- 505 Assaf Y, Johansen-Berg H, Thiebaut de Schotten M (2017) The role of diffusion MRI  
506 in neuroscience. *NMR Biomed*:1–16.
- 507 Bechler ME, Swire M, French-Constant C (2018) Intrinsic and adaptive myelination—  
508 A sequential mechanism for smart wiring in the brain. *Dev Neurobiol* 78:68–79.
- 509 Bohbot VD, Kalina M, Stepankova K, Spackova N, Petrides M, Nadel L (1998)  
510 Spatial memory deficits in patients with lesions to the right hippocampus and to  
511 the right parahippocampal cortex. *Neuropsychologia* 36:1217–1238.
- 512 Braak H, Braak E (1991) Neuropathological staging of Alzheimer-related changes.  
513 *Acta Neuropathol* 82:239–259.
- 514 Buckley MJ, Wilson CRE, Gaffan D (2008) Fornix transection impairs visuospatial  
515 memory acquisition More than retrieval. *Behav Neurosci* 122:44–53.
- 516 Budisavljevic S, Kawadler JM, Dell'Acqua F, Rijdsdijk F V., Kane F, Picchioni M,  
517 McGuire P, Touloupoulou T, Georgiades A, Kalidindi S, Kravariti E, Murray RM,  
518 Murphy DG, Craig MC, Catani M (2016) Heritability of the limbic networks. *Soc*  
519 *Cogn Affect Neurosci* 11:746–757.
- 520 Cain DP, Boon F, Corcoran ME (2006) Thalamic and hippocampal mechanisms in  
521 spatial navigation: A dissociation between brain mechanisms for learning how  
522 versus learning where to navigate. *Behav Brain Res* 170:241–256.



- 523 Chersi F, Burgess N (2015) The cognitive architecture of spatial navigation:  
524 hippocampal and striatal contributions. *Neuron* 88:64–77.
- 525 Chrastil ER, Sherrill KR, Aselcioglu I, Hasselmo ME, Stern CE (2017) Individual  
526 differences in human path integration abilities correlate with gray matter volume  
527 in retrosplenial cortex, hippocampus, and medial prefrontal cortex. *Eneuro*  
528 4:ENEURO.0346-16.2017.
- 529 Concha L, Gross DW, Beaulieu C (2005) Diffusion tensor tractography of the limbic  
530 system. *Am J Neuroradiol* 26:2267–2274.
- 531 Croux C, Dehon C (2010) Influence functions of the Spearman and Kendall  
532 correlation measures. *Stat Methods Appl* 19:497–515.
- 533 De Bruin JPC, Moita MP, De Brabander HM, Joosten RNJMA (2001) Place and  
534 response learning of rats in a Morris water maze: Differential effects of fimbria  
535 fornix and medial prefrontal cortex lesions. *Neurobiol Learn Mem* 75:164–178.
- 536 Devan BD, Goad EH, Petri HL (1996) Dissociation of hippocampal and striatal  
537 contributions to spatial navigation in the water maze. *Neurobiol Learn Mem*  
538 66:305–323.
- 539 Diedenhofen B, Musch J (2015) Cocor: A comprehensive solution for the statistical  
540 comparison of correlations. *PLoS One* 10:1–12.
- 541 Dubois J, Dehaene-Lambertz G, Perrin M, Mangin JF, Cointepas Y, Duchesnay E,  
542 Le Bihan D, Hertz-Pannier L (2008) Asynchrony of the early maturation of white  
543 matter bundles in healthy infants: Quantitative landmarks revealed noninvasively  
544 by diffusion tensor imaging. *Hum Brain Mapp* 29:14–27.
- 545 Dumont JR, Amin E, Wright NF, Dillingham CM, Aggleton JP (2015) The impact of  
546 fornix lesions in rats on spatial learning tasks sensitive to anterior thalamic and  
547 hippocampal damage. *Behav Brain Res* 278:360–374.

- 548 Eichenbaum H (2017) On the integration of space, time, and memory. *Neuron*  
549 95:1007–1018.
- 550 Eichenbaum H, Stewart C, Morris RG (1990) Hippocampal representation in place  
551 learning. *J Neurosci* 10:3531–3542.
- 552 Ekstrom AD (2015) Why vision is important to how we navigate. *Hippocampus*  
553 25:731–735.
- 554 Ekstrom AD, Huffman DJ, Starrett M (2017) Interacting networks of brain regions  
555 underlie human spatial navigation: A review and novel synthesis of the literature.  
556 *J Neurophysiol*:jn.00531.2017.
- 557 Ekstrom AD, Ranganath C (2017) Space, time, and episodic memory: The  
558 hippocampus is all over the cognitive map. *Hippocampus*:1–8.
- 559 Fidalgo C, Martin CB (2016) The hippocampus contributes to allocentric spatial  
560 memory through coherent scene representations. *J Neurosci* 36:2555–2557.
- 561 Gaffan D (1991) Spatial organization of episodic memory. *Hippocampus* 1:262–264.
- 562 Gaffan D (1992) Amnesia for complex naturalistic scenes and for objects following  
563 fornix transection in the rhesus monkey. *Eur J Neurosci* 4:381–388.
- 564 Gaffan D (1994) Scene-specific memory for objects: a model of episodic memory  
565 impairment in monkeys with fornix transection. *J Cogn Neurosci* 6:305–320.
- 566 Gaffan EA, Bannerman DM, Warburton EC, Aggleton JP (2001) Rats' processing of  
567 visual scenes: Effects of lesions to fornix, anterior thalamus, mamillary nuclei or  
568 the retrohippocampal region. *Behav Brain Res* 121:103–117.
- 569 Hodgetts CJ, Postans M, Shine JP, Jones DK, Lawrence AD, Graham KS (2015)  
570 Dissociable roles of the inferior longitudinal fasciculus and fornix in face and  
571 place perception. *Elife* 4:e07902.
- 572 Hodgetts CJ, Postans M, Warne N, Varnava A, Lawrence AD, Graham KS (2017)

- 573 Distinct contributions of the fornix and inferior longitudinal fasciculus to episodic  
574 and semantic autobiographical memory. *Cortex* 94:1–14.
- 575 Hofstetter S, Tavor I, Tzur Moryosef S, Assaf Y (2013) Short-Term Learning Induces  
576 White Matter Plasticity in the Fornix. *J Neurosci* 33:12844–12850.
- 577 Huber E, Henriques RN, Owen JP, Rokem A, Yeatman JD (2018) Applying  
578 biophysical models to understand the role of white matter in cognitive  
579 development. *bioRxiv*:347872.
- 580 Hullinger R, Burger C (2015) Learning impairments identified early in life are  
581 predictive of future impairments associated with aging. *Behav Brain Res*  
582 294:224–233.
- 583 Iaria G, Barton JJS (2010) Developmental topographical disorientation: A newly  
584 discovered cognitive disorder. *Exp Brain Res* 206:189–196.
- 585 Iaria G, Bogod N, Fox CJ, Barton JJS (2009) Developmental topographical  
586 disorientation: Case one. *Neuropsychologia* 47:30–40.
- 587 Ikonen S, McMahan R, Gallagher M, Eichenbaum H, Tanila H (2002) Cholinergic  
588 system regulation of spatial representation by the hippocampus. *Hippocampus*  
589 12:386–397.
- 590 Jankowski MM, Ronnqvist KC, Tsanov M, Vann SD, Wright NF, Erichsen JT,  
591 Aggleton JP, O'Mara SM (2013) The anterior thalamus provides a subcortical  
592 circuit supporting memory and spatial navigation. *Front Syst Neurosci* 7:45.
- 593 Jeurissen B, Leemans A, Jones DK, Tournier JD, Sijbers J (2011) Probabilistic fiber  
594 tracking using the residual bootstrap with constrained spherical deconvolution.  
595 *Hum Brain Mapp* 32:461–479.
- 596 Kahn AE, Mattar MG, Vettel JM, Wymbs NF, Grafton ST, Bassett DS (2017)  
597 Structural pathways supporting swift acquisition of new visuomotor skills. *Cereb*

- 598 Cortex 27:173–184.
- 599 Kolarik BS, Shahlaie K, Hassan A, Borders AA, Kaufman KC, Gurkoff G, Yonelinas  
600 AP, Ekstrom AD (2016) Impairments in precision, rather than spatial strategy,  
601 characterize performance on the virtual Morris Water Maze: A case study.  
602 Neuropsychologia 80:90–101.
- 603 Lakens D (2016) Why you don't need to adjust your alpha level for all tests you'll do  
604 in your lifetime. 20% Stat Available at:  
605 [http://daniellakens.blogspot.com/2016/02/why-you-dont-need-to-adjust-your-](http://daniellakens.blogspot.com/2016/02/why-you-dont-need-to-adjust-your-alpha.html)  
606 [alpha.html](http://daniellakens.blogspot.com/2016/02/why-you-dont-need-to-adjust-your-alpha.html).
- 607 Landau B, Lakusta L (2009) Spatial representation across species: geometry,  
608 language, and maps. Curr Opin Neurobiol 19:12–19.
- 609 Latini F (2015) New insights in the limbic modulation of visual inputs: The role of the  
610 inferior longitudinal fasciculus and the Li-Am bundle. Neurosurg Rev 38:179–  
611 190.
- 612 Lebel C, Gee M, Camicioli R, Wieler M, Martin W, Beaulieu C (2012) Diffusion tensor  
613 imaging of white matter tract evolution over the lifespan. Neuroimage 60:340–  
614 352.
- 615 Lee SA, Spelke ES (2010) Two systems of spatial representation underlying  
616 navigation. Exp Brain Res 206:179–188.
- 617 Lee SJ, Steiner RJ, Luo S, Neale MC, Styner M, Zhu H, Gilmore JH (2015)  
618 Quantitative tract-based white matter heritability in twin neonates. Neuroimage  
619 111:123–135.
- 620 Leemans A, Jones DK (2009) The B-matrix must be rotated when correcting for  
621 subject motion in DTI data. Magn Reson Med 61:1336–1349.
- 622 Lester AW, Moffat SD, Wiener JM, Barnes CA, Wolbers T (2017) The aging

- 623 navigational system. *Neuron* 95:1019–1035.
- 624 Maguire E a, Frackowiak RS, Frith CD (1997) Recalling routes around london:  
625 activation of the right hippocampus in taxi drivers. *J Neurosci* 17:7103–7110.
- 626 Metzler-Baddeley C, Jones DK, Belaroussi B, Aggleton JP, O’Sullivan MJ (2011)  
627 Frontotemporal Connections in Episodic Memory and Aging: A Diffusion MRI  
628 Tractography Study. *J Neurosci* 31:13236–13245.
- 629 Miller VM, Best PJ (1980) Spatial correlates of hippocampal unit activity are altered  
630 by lesions of the fornix and entorhinal cortex. *Brain Res* 194:311–323.
- 631 Moran NF, Lemieux L, Kitchen ND, Fish DR, Shorvon SD (2001) Extrahippocampal  
632 temporal lobe atrophy in temporal lobe epilepsy and mesial temporal sclerosis.  
633 *Brain* 124:167–175.
- 634 Morris R (1984) Developments of a water-maze procedure for studying spatial  
635 learning in the rat. *J Neurosci Methods* 11:47–60.
- 636 Murray EA, Wise SP, Graham (2016) *The evolution of memory systems*. Oxford, UK:  
637 Oxford University Press.
- 638 Murray EA, Wise SP, Graham KS (2017) Representational specializations of the  
639 hippocampus in phylogenetic perspective. *Neurosci Lett*.
- 640 O’Keefe J, Nadel L (1976) *The hippocampus as a cognitive map*. Oxford: Clarendon  
641 Press.
- 642 O’Keefe J, Nadel L, Keightley S, Kill D (1975) Fornix lesions selectively abolish place  
643 learning in the rat. *Exp Neurol* 48:152–166.
- 644 Oishi K, Mielke MM, Albert M, Lyketsos CG, Mori S (2012) The fornix sign: A  
645 potential sign for alzheimer’s disease based on diffusion tensor imaging. *J*  
646 *Neuroimaging* 22:365–374.
- 647 Olton DS, Walker JA, Gage FH (1978) Hippocampal connections and spatial

- 648 discrimination. *Brain Res* 139:295–308.
- 649 Packard MG, Hirsh R, White NM (1989) Differential effects of fornix and caudate  
650 nucleus lesions on two radial maze tasks: evidence for multiple memory  
651 systems. *J Neurosci* 9:1465–1472.
- 652 Packard MG, McGaugh JL (1992) Double dissociation of fornix and caudate nucleus  
653 lesions on acquisition of two water maze tasks: further evidence for multiple  
654 memory systems. *Behav Neurosci* 106:439–446.
- 655 Pasternak O, Sochen N, Gur Y, Intrator N, Assaf Y (2009) Free water elimination  
656 and mapping from diffusion MRI. *Magn Reson Med* 62:717–730.
- 657 Patenaude B, Smith SM, Kennedy D, Jenkinson M (2012) NIH Public Access.  
658 *Neuroimage* 56:907–922.
- 659 Pereira T, Burwell RD (2015) Using the spatial learning index to evaluate  
660 performance on the water maze. *Behav Neurosci* 129:533–539.
- 661 Possin KL, Sanchez PE, Anderson-Bergman C, Fernandez R, Kerchner GA,  
662 Johnson ET, Davis A, Lo I, Bott NT, Kiely T, Fenesy MC, Miller BL, Kramer JH,  
663 Finkbeiner S (2016) Cross-species translation of the Morris maze for  
664 Alzheimer’s disease. *J Clin Invest* 126:779–783.
- 665 Postans M, Hodgetts CJ, Mundy ME, Jones DK, Lawrence AD, Graham KS (2014)  
666 Interindividual variation in fornix microstructure and macrostructure is related to  
667 visual discrimination accuracy for scenes but not faces. *J Neurosci* 34:12121–  
668 12126.
- 669 Qi Z, Han M, Garel K, San Chen E, Gabrieli JDE (2015) White-matter structure in the  
670 right hemisphere predicts Mandarin Chinese learning success. *J*  
671 *Neurolinguistics* 33:14–28.
- 672 Ripollés P, Biel D, Peñalosa C, Kaufmann J, Marco-Pallarés J, Noesselt T,

- 673 Rodríguez-Fornells A (2017) Strength of temporal white matter pathways  
674 predicts semantic learning. *J Neurosci* 37:1720–17.
- 675 Rudebeck SR, Scholz J, Millington R, Rohenkohl G, Johansen-Berg H, Lee ACH  
676 (2009) Fornix microstructure correlates with recollection but not familiarity  
677 memory. *J Neurosci* 29:14987–14992.
- 678 Ryan L, Lin CY, Ketcham K, Nadel L (2010) The role of medial temporal lobe in  
679 retrieving spatial and nonspatial relations from episodic and semantic memory.  
680 *Hippocampus* 20:11–18.
- 681 Saunders RC, Aggleton JP (2007) Origin and topography of fibers contributing to the  
682 fornix in macaque monkeys. *Hippocampus* 17:396–411.
- 683 Schinazi VR, Nardi D, Newcombe NS, Shipley TF, Epstein RA (2013) Hippocampal  
684 size predicts rapid learning of a cognitive map in humans. *Hippocampus*  
685 23:515–528.
- 686 Shapiro ML, Simon DK, Olton DS, Gage FH, Nilsson O, Björklund A (1989)  
687 Intrahippocampal grafts of fetal basal forebrain tissue alter place fields in the  
688 hippocampus of rats with fimbria-fornix lesions. *Neuroscience* 32:1–18.
- 689 Simpson EL, Gaffan EA, Eacott MJ (1998) Rats' object-in-place encoding and the  
690 effect of fornix transection. *Psychobiol* 26:190–204.
- 691 Steiger JH (1980) Tests for comparing elements of a correlation matrix. *Psychol Bull*  
692 87:245–251.
- 693 Stepanov II, Abramson CI (2008) The application of the first order system transfer  
694 function for fitting the 3-arm radial maze learning curve. *J Math Psychol* 52:311–  
695 321.
- 696 Sutherland RJ, Rodriguez AJ (1989) The role of the fornix/fimbria and some related  
697 subcortical structures in place learning and memory. *Behav Brain Res* 32:265–

- 698           277.
- 699 Tolman EC (1948) Cognitive maps in rats and men. *Psychol Rev* 55:189–208.
- 700 Tuch DS, Reese TG, Wiegell MR, Makris N, Belliveau JW, Van Wedeen J (2002)
- 701           High angular resolution diffusion imaging reveals intravoxel white matter fiber
- 702           heterogeneity. *Magn Reson Med* 48:577–582.
- 703 Wakana S, Caprihan A, Panzenboeck MM, Fallon JH, Perry M, Gollub RL, Hua K,
- 704           Zhang J, Jiang H, Dubey P, Blitz A, van Zijl P, Mori S (2007) Reproducibility of
- 705           quantitative tractography methods applied to cerebral white matter. *Neuroimage*
- 706           36:630–644.
- 707 Warburton EC, Aggleton JP (1998) Differential deficits in the Morris water maze
- 708           following cytotoxic lesions of the anterior thalamus and fornix transection. *Behav*
- 709           *Brain Res* 98:27–38.
- 710 Warburton EC, Aggleton JP, Muir JL (1998) Comparing the effects of selective
- 711           cingulate cortex lesions and cingulum bundle lesions on water maze
- 712           performance by rats. *Eur J Neurosci* 10:622–634.
- 713 Westman E, Aguilar C, Muehlboeck JS, Simmons A (2013) Regional magnetic
- 714           resonance imaging measures for multivariate analysis in Alzheimer’s disease
- 715           and mild cognitive impairment. *Brain Topogr* 26:9–23.
- 716 Wetzels R, Wagenmakers EJ (2012) A default Bayesian hypothesis test for
- 717           correlations and partial correlations. *Psychon Bull Rev* 19:1057–1064.
- 718 Whishaw IQ, Maaswinkel H (1998) Rats with fimbria-fornix lesions are impaired in
- 719           path integration: a role for the hippocampus in “sense of direction”. *J Neurosci*
- 720           18:3050–3058.
- 721 Wilcox RR (2016) Comparing dependent robust correlations. *Br J Math Stat Psychol*
- 722           69:215–224.



723 Wolbers T, Hegarty M (2010) What determines our navigational abilities? Trends

724 Cogn Sci 14:138–146.

725 Wolbers T, Wiener JM (2014) Challenges for identifying the neural mechanisms that

726 support spatial navigation: the impact of spatial scale. Front Hum Neurosci

727 8:571.

728

729

730

731

732

733

734

735

736

737

738

739

740

741

742

743

744

745

746

747

748 **Author contributions**

749 CJH, MS, BK, ADE and KSG contributed to the conception and design of the  
750 experiment; MS collected imaging and behavioural data; CJH, MS, ANW, BK and JZ  
751 analysed the data; CJH wrote the manuscript with input from all other authors.

752

753 **Acknowledgments**

754 We would like to thank Ofer Pasternak and Greg Parker for providing the free water  
755 correction pipeline, and John Evans and Peter Hobden for scanning support.

756

757 **Funding**

758 This work was supported by funds from the Medical Research Council (G1002149,  
759 CJH, KSG; MR/N01233X/1, KSG, ANW), a Wellcome Trust Strategic Award  
760 (104943/Z/14/Z), the National Institute of Health (R01EY025999, APY;  
761 R01NS076856, ADE), the National Institute of Neurological Disorders and Stroke  
762 (NSF BCS-1630296, ADE), the European Research Council ERC starting grant  
763 (716321, JZ), the Wellcome Trust Institutional Strategic Support Fund (CJH) and a  
764 Cardiff University School of Psychology PhD studentship (MS).
